# Supplementary material
Source: Research Square preprint supplement (doi:10.21203/rs.3.rs-9268709/v1)
Supplement: Supplementary file 1 [file 102f2e31e19d0693cd2cdcc3.docx]

| |  | **Supplementary Table 1**  **Complete Scoring Matrix**  **Scoring and aggregation**  Within each scenario, all STAT items were scored as 0 (needed and not done), 1 (incomplete or untimely), or 2 (complete and timely) and weighted equally within that scenario. Timeliness was judged relative to the expected sequence and prioritization of critical actions within each pre-specified scenario progression.  Raw STAT scores were converted into percentages of the maximum achievable scenario-specific score. TEAM and CALM scores were likewise converted into percentages of their respective maximum scores. For the primary outcome in the main manuscript, the composite score was calculated as 50% STAT, 25% TEAM, and 25% CALM.  **STAT TOOL for SCENARIO 1**  **(Polytrauma with tension pneumothorax and open ankle fracture)** |  |  | | --- | --- | --- | --- | |  | **1. Basic skills** |  |  | | 1.01 | Obtains **SAMPLE** history (signs/symptoms, allergies, meds, past illness, last meal, events preceding) | Score: |  | | 1.02 | Performs **primary survey** (XABCDE) | Score: |  | | 1.03 | Performs **secondary survey** (head to toe exam) | Score: |  | | 1.04 | Ensures cardiorespiratory and O2 **monitors** placed | Score: |  | | 1.05 | Obtains **vascular access** | Score: |  | | 1.06 | **Recognizes** urgent/emergent situation (either start of scenario or with decompensation) | Score: |  | | 1.07 | Team uses appropriate universal **precautions** (including checking for a safe work environment and hazards such as rockfall) | Score: |  | | 1.08 | Chooses **appropriate hospital** with the necessary facilities and specialists to treat the patient’s injuries and medical problems | Score: |  | | 1.09 | **Provides updates** to the patient | Score: |  | |  |  |  |  | |  | **2. Airway, spine and breathing skills** |  |  | | 2.01 | Assesses **airway** | Score: |  | | 2.02 | Assesses **breathing** | Score: |  | | 2.03 | Performs **airway manoeuvres** (e.g. inspection of the mouth for loose teeth) | Score: |  | | 2.04 | Provides **supplemental oxygen** | Score: |  | | 2.05 | Performs cervical spine **immobilisation** | Score: |  | | 2.06 | Assesses **chest rise** | Score: |  | | 2.07 | Uses proper technique to **localize incision point** for needle or tube decompression | Score: |  | | 2.08 | Performs needle or tube thoracostomy with appropriate analgesia/sedation or local anaesthesia | Score: |  | | 2.09 | Uses **appropriate medication doses** for analgosedation or local anaesthesia (Despite the paramedic misunderstanding the dose) | Score: |  | | 2.10 | Initiates **team efforts for** chest **decompression** | Score: |  | | 2.11 | **Assesses** the patient for signs of **successful decompression** | Score: |  | | 2.12 | **Reassesses the patient** when **repeated** acute **deterioration** occurs | Score: |  | | 2.13 | **Performs repeated** thoracic **decompression** after second deterioration | Score: |  | | 2.14 | **Places definitive chest tube** or performs mini thoracotomy with correct technique before transportation | Score: |  | | 2.15 | **Secures** chest tube or ensures mini thoracotomy stays open for escaping air during transport (e.g. with a chest seal) | Score: |  | |  |  |  |  | |  | **3. Circulation Skills** |  |  | | 3.01 | Assesses **heart rate** | Score: |  | | 3.02 | Assesses **blood pressure** | Score: |  | | 3.03 | Initiates **volume resuscitation** | Score: |  | | 3.04 | Selects **appropriate fluid** and **dose** | Score: |  | | 3.05 | Checks distal perfusion, motor function, and sensation at the fractured extremity before repositioning. | Score: |  | | 3.06 | Performs appropriate **analgesia and sedation** before repositioning of the ankle (Despite the paramedic misunderstanding the dose) | Score: |  | | 3.07 | Uses appropriate material to **keep the repositioned ankle in place**, e.g. Samsplint with a bandage or vacuum splint | Score: |  | | 3.08 | Checks distal perfusion, motor function, and sensation at the fractured extremity after repositioning. | Score: |  |  |  | **STAT TOOL for SCENARIO 2**  **(Myocardial infarction in an elderly patient, presenting with atypical symptoms (abdominal discomfort) and progressing to cardiac arrest)** |  |  | | --- | --- | --- | --- | |  | **1. Basic skills** |  |  | | 1.01 | Obtains **SAMPLE** history (signs/symptoms, allergies, meds, past illness, last meal, events preceding) | Score: |  | | 1.02 | Performs **primary survey** (XABCDE) | Score: |  | | 1.03 | Performs **secondary survey** (head to toe exam) | Score: |  | | 1.04 | Ensures cardiorespiratory and O2 **monitors** placed | Score: |  | | 1.05 | Obtains **vascular access** | Score: |  | | 1.06 | Orders necessary additional diagnostic (i.e. **12-lead ECG**) | Score: |  | | 1.07 | Notices **pathological changes** in the **1st ECG** (ST-depressions, possible posterior MI) | Score: |  | | 1.08 | Orders **repeated 12-lead ECG** when patient deteriorates **OR** orders **posterior leads** in first ECG to uncover posterior MI | Score: |  | | 1.09 | Notices **pathological changes** in the **2nd ECG** **OR** in the **posterior leads** of the 1st ECG (ST-elevation cardiac infarction) | Score: |  | | 1.10 | **Recognizes** urgent/emergent situation (either start of scenario or with decompensation) | Score: |  | | 1.11 | Team uses appropriate universal **precautions** (e.g. ensuring a safe work environment, making sure no one touches patient during defibrillation) | Score: |  | | 1.12 | Chooses **appropriate hospital** with the necessary facilities and specialists to treat the patient’s injuries and medical problems (i.e. prepares to transport to an **eCPR centre**) | Score: |  | | 1.13 | **Provides updates** to the patient | Score: |  | |  |  |  |  | |  | **2. Airway, spine and breathing skills** |  |  | | 2.01 | Assesses **airway** | Score: |  | | 2.02 | Assesses **breathing** | Score: |  | | 2.03 | Provides **supplemental oxygen only when indicated** (not indicated while >94% SpO2 with suspected MI) | Score: |  | | 2.04 | Initiates **BMV** | Score: |  | | 2.05 | Bags at **appropriate rate** with proper technique and positioning | Score: |  | | 2.06 | Assesses chest rise | Score: |  | | 2.07 | Initiates **team efforts** for endotracheal intubation | Score: |  | | 2.08 | Selects **appropriate** endotracheal tube and laryngoscope **size** | Score: |  | | 2.09 | Ensures **suction** is on before intubation | Score: |  | | 2.10 | Uses **appropriate** endotracheal tube insertion **technique** | Score: |  | | 2.11 | **Secures tube** or supraglottic-airway-device | Score: |  | | 2.12 | Checks **end-tidal CO2** | Score: |  | | 2.13 | Assesses ventilation after intubation: chest rise, **auscultation** | Score: |  | | 2.14 | Places **NG or OG tube** after intubation | Score: |  | |  |  |  |  | |  | **3. Circulation Skills** |  |  | | 3.01 | Assesses **heart rate** | Score: |  | | 3.02 | Assesses **blood pressure** | Score: |  | | 3.03 | Assesses distal perfusion (**cap refill**) | Score: |  | | 3.04 | Initiates **volume resuscitation** | Score: |  | | 3.05 | Selects **appropriate fluid** and **dose** (despite the paramedic choosing HAES) | Score: |  | | 3.06 | Initiates appropriate **drug treatment for ST-elevation myocardial infarction** at the correct dose (e.g. opioid, aspirin, heparin). | Score: |  | | 3.07 | Initiates **CPR** with correct hand placement and rate of chest compressions | Score: |  | | 3.08 | Assesses quality of CPR and **corrects paramedic** when his/her chest compressions deteriorate | Score: |  | | 3.09 | **Minimizes interruptions** in CPR, especially before and after the delivery of shocks | Score: |  | | 3.10 | **Diagnoses abnormal rhythm** correctly | Score: |  | | 3.11 | Recognizes **need for defibrillation** | Score: |  | | 3.12 | **Doses electricity correctly** with correctly placed pads | Score: |  | | 3.13 | Follows ALS algorithm | Score: |  | | 3.14 | Doses **medication appropriately** during resuscitation | Score: |  | | 3.15 | **Reevaluates rhythm** after 5 cycles of CPR (or 2 minutes of CPR) | Score: |  |  |  | **STAT TOOL for SCENARIO 3**  **(Recurrent epileptic seizures and respiratory failure in a five-month-old baby with meningitis and pulmonary aspiration, mother present on scene)** |  |  | | --- | --- | --- | --- | |  | **1. Basic skills** |  |  | | 1.01 | Obtains **SAMPLE** history (signs/symptoms, allergies, meds, past illness, last meal, events preceding) | Score: |  | | 1.02 | Performs **primary survey** (XABCDE) | Score: |  | | 1.03 | Performs **secondary survey** (head to toe exam) | Score: |  | | 1.04 | Estimates/obtains **pt weight** | Score: |  | | 1.05 | Ensures cardiorespiratory and O2 **monitors** placed | Score: |  | | 1.06 | Attempts **vascular access** | Score: |  | | 1.07 | Obtains **IO access** when vascular access is impossible | Score: |  | | 1.08 | Recognizes **urgent/emergent situation** (either start of scenario or with decompensation) | Score: |  | | 1.09 | Team uses appropriate universal precautions (e.g. **wears mask** when infectious illnesses suspected) | Score: |  | | 1.10 | Chooses **appropriate hospital** with the necessary facilities and specialists to treat the patient’s injuries and medical problems | Score: |  | | 1.11 | Provides **updates to parent** | Score: |  | |  |  |  |  | |  | **2. Airway, spine and breathing skills** |  |  | | 2.01 | Assesses **airway** | Score: |  | | 2.02 | Assesses **breathing** | Score: |  | | 2.03 | Performs airway manoeuvres (i.e. **suction of nasal secretions**) | Score: |  | | 2.04 | Provides **supplemental oxygen** | Score: |  | | 2.05 | **Connects** the **oxygen supply** correctly (even though the paramedic does not) | Score: |  | | 2.06 | Initiates **BMV** | Score: |  | | 2.07 | Bags at **appropriate rate** with proper technique and positioning | Score: |  | | 2.08 | Assesses **chest rise** | Score: |  | | 2.09 | Initiates **team efforts** for endotracheal intubation | Score: |  | | 2.10 | Selects **appropriate sedative/induction** medications | Score: |  | | 2.11 | Uses **appropriate sedative/induction dose** (using code sheet or electronic application if needed) | Score: |  | | 2.12 | Selects **appropriate paralytic medication** | Score: |  | | 2.13 | Uses **appropriate paralytic dose** (using code sheet or electronic application if needed) | Score: |  | | 2.14 | Communicates an **appropriate plan B** in case of difficult or failed airway management | Score: |  | | 2.15 | **Pre-oxygenates** patient | Score: |  | | 2.16 | Selects **appropriate sizes** for endotracheal tube (or SGA) and laryngoscope | Score: |  | | 2.17 | Ensures **suction is on** before intubation | Score: |  | | 2.18 | Uses **appropriate** endotracheal tube or SGA insertion **technique** | Score: |  | | 2.19 | **Secures** endotracheal tube/ SGA | Score: |  | | 2.20 | Checks **end-tidal CO2** | Score: |  | | 2.21 | Assesses ventilation: chest rise, **auscultation** | Score: |  | | 2.22 | Places **NG or OG tube** after intubation | Score: |  | |  |  |  |  | |  | **3. Circulation Skills** |  |  | | 3.01 | Assesses **heart rate** | Score: |  | | 3.02 | Assesses **blood pressure** | Score: |  | | 3.03 | Assesses distal perfusion (**cap refill**) | Score: |  | | 3.04 | Initiates **volume resuscitation** | Score: |  | | 3.05 | Selects **appropriate fluid** and **dose** | Score: |  | | 3.06 | Recognizes need for **antiepileptic medication** | Score: |  | | 3.07 | Uses appropriate **antiepileptic medication dose** (using code sheet or electronic application if needed) | Score: |  | | 3.08 | Escalates to an appropriate **alternative antiepileptic medication** (or general anaesthesia) when persistent seizures re-occur | Score: |  | | 3.09 | Recognizes need for **vasoactive medication** (in ongoing hypotension or after induction) | Score: |  | | 3.10 | Uses appropriate **vasoactive medication dose** (using code sheet or electronic application if needed) | Score: |  | | 3.11 | Recognizes likely septic shock in suspected **Waterhouse–Friderichsen syndrome** | Score: |  | | 3.12 | Considers and initiates **antibiotic treatment** | Score: |  | | 3.13 | **Prioritizes urgent transport** to hospital for definitive management of sepsis | Score: |  |  |  | **STAT TOOL for SCENARIO 4**  **(Severe accidental hypothermia with unstable bradyarrhythmia, progressing to ventricular fibrillation due to rescue collapse)** |  |  | | --- | --- | --- | --- | |  | **1. Basic skills** |  |  | | 1.01 | Obtains **SAMPLE** history (signs/symptoms, allergies, meds, past illness, last meal, events preceding) | Score: |  | | 1.02 | Performs **primary survey** (XABCDE) | Score: |  | | 1.03 | Performs **secondary survey** (head to toe exam) | Score: |  | | 1.04 | Ensures cardiorespiratory and O2 **monitors** placed | Score: |  | | 1.05 | Attempts **vascular access** | Score: |  | | 1.06 | Obtains **IO access** when vascular access is impossible | Score: |  | | 1.07 | Recognizes pathological **ECG** findings (bradycardic sinus rhythm at 38/min and J waves) | Score: |  | | 1.08 | Recognizes **urgent/emergent situation** (either start of scenario or with decompensation) | Score: |  | | 1.09 | Team uses appropriate universal **precautions** (e.g. ensuring a safe work environment, making sure no one touches patient during defibrillation) | Score: |  | | 1.10 | Takes precautions to **avoid rescue collapse** (avoids unnecessary movement and handles the patient slowly and carefully when movement is necessary) | Score: |  | | 1.11 | Chooses **appropriate hospital** with the necessary facilities and specialists to treat the patient’s injuries and medical problems (i.e. an ECMO centre) | Score: |  | | 1.12 | Provides **updates to patient** | Score: |  | |  |  |  |  | |  | **2. Airway, spine and breathing skills** |  |  | | 2.01 | Assesses **airway** | Score: |  | | 2.02 | Assesses **breathing** | Score: |  | | 2.03 | Provides **supplemental oxygen** (because the patient is cyanotic, the SpO2 is not directly measurable due to cold skin) | Score: |  | | 2.04 | Initiates **BMV** | Score: |  | | 2.05 | Bags at **appropriate rate** with proper technique and positioning | Score: |  | | 2.06 | Assesses **chest rise** | Score: |  | | 2.07 | Initiates **team efforts** for endotracheal intubation | Score: |  | | 2.08 | Selects **appropriate** **laryngoscope** and endotracheal **tube** with **stylet** despite the paramedic choosing a tube without introducer device | Score: |  | | 2.09 | Ensures **suction** is on before intubation | Score: |  | | 2.10 | Uses **appropriate** endotracheal tube insertion **technique** | Score: |  | | 2.11 | **Secures** tube or supraglottic-airway-device | Score: |  | | 2.12 | Checks **end-tidal CO2** | Score: |  | | 2.13 | Assesses ventilation after intubation: chest rise, **auscultation** | Score: |  | | 2.14 | Places **NG or OG tube** after intubation | Score: |  | |  |  |  |  | |  | **3. Circulation Skills** |  |  | | 3.01 | Assesses **heart rate** | Score: |  | | 3.02 | Assesses **blood pressure** | Score: |  | | 3.03 | Assesses distal perfusion (**cap refill**) | Score: |  | | 3.04 | Initiates **volume resuscitation** | Score: |  | | 3.05 | Selects **appropriate fluid** and **dose** | Score: |  | | 3.06 | Assesses **blood glucose** (2.8 mmol/l) | Score: |  | | 3.07 | **Administers glucose** appropriately | Score: |  | | 3.08 | Initiates **CPR** with correct hand placement and rate of chest compressions | Score: |  | | 3.09 | **Assesses quality** of CPR | Score: |  | | 3.10 | **Minimizes interruptions** in CPR, especially before and after the delivery of shocks | Score: |  | | 3.11 | **Diagnoses abnormal rhythm** correctly | Score: |  | | 3.12 | Recognizes **need for defibrillation** | Score: |  | | 3.13 | **Doses electricity correctly** with correctly placed pads | Score: |  | | 3.14 | Follows **ALS algorithm in hypothermic patients** (temp 29.2°), e.g. verbalizes that a maximum of three shocks should be administered | Score: |  | | 3.15 | Doses **medication appropriately** for hypothermic patient during resuscitation (i.e. **no adrenaline** in hypothermia <30°) | Score: |  | | 3.16 | **Reevaluates rhythm** after 5 cycles of CPR (or 2 minutes of CPR) | Score: |  | | 3.17 | Recognizes need for **vasoactive medication** after ROSC, but **does not use external pacing** in hypothermia <30°) | Score: |  | | 3.18 | Uses **appropriate vasoactive medication dose** | Score: |  | | |  |  | |
| --- | --- | --- | --- | --- | --- | --- | --- | --- | --- | --- | --- | --- | --- | --- | --- | --- | --- | --- | --- | --- | --- | --- | --- | --- | --- | --- | --- | --- | --- | --- | --- | --- | --- | --- | --- | --- | --- | --- | --- | --- | --- | --- | --- | --- | --- | --- | --- | --- | --- | --- | --- | --- | --- | --- | --- | --- | --- | --- | --- | --- | --- | --- | --- | --- | --- | --- | --- | --- | --- | --- | --- | --- | --- | --- | --- | --- | --- | --- | --- | --- | --- | --- | --- | --- | --- | --- | --- | --- | --- | --- | --- | --- | --- | --- | --- | --- | --- | --- | --- | --- | --- | --- | --- | --- | --- | --- | --- | --- | --- | --- | --- | --- | --- | --- | --- | --- | --- | --- | --- | --- | --- | --- | --- | --- | --- | --- | --- | --- | --- | --- | --- | --- | --- | --- | --- | --- | --- | --- | --- | --- | --- | --- | --- | --- | --- | --- | --- | --- | --- | --- | --- | --- | --- | --- | --- | --- | --- | --- | --- | --- | --- | --- | --- | --- | --- | --- | --- | --- | --- | --- | --- | --- | --- | --- | --- | --- | --- | --- | --- | --- | --- | --- | --- | --- | --- | --- | --- | --- | --- | --- | --- | --- | --- | --- | --- | --- | --- | --- | --- | --- | --- | --- | --- | --- | --- | --- | --- | --- | --- | --- | --- | --- | --- | --- | --- | --- | --- | --- | --- | --- | --- | --- | --- | --- | --- | --- | --- | --- | --- | --- | --- | --- | --- | --- | --- | --- | --- | --- | --- | --- | --- | --- | --- | --- | --- | --- | --- | --- | --- | --- | --- | --- | --- | --- | --- | --- | --- | --- | --- | --- | --- | --- | --- | --- | --- | --- | --- | --- | --- | --- | --- | --- | --- | --- | --- | --- | --- | --- | --- | --- | --- | --- | --- | --- | --- | --- | --- | --- | --- | --- | --- | --- | --- | --- | --- | --- | --- | --- | --- | --- | --- | --- | --- | --- | --- | --- | --- | --- | --- | --- | --- | --- | --- | --- | --- | --- | --- | --- | --- | --- | --- | --- | --- | --- | --- | --- | --- | --- | --- | --- | --- | --- | --- | --- | --- | --- | --- | --- | --- | --- | --- | --- | --- | --- | --- | --- | --- | --- | --- | --- | --- | --- | --- | --- | --- | --- | --- | --- | --- | --- | --- | --- | --- | --- | --- | --- | --- | --- | --- | --- | --- | --- | --- | --- | --- | --- | --- | --- | --- | --- | --- | --- | --- | --- | --- | --- | --- | --- | --- | --- | --- | --- | --- | --- | --- | --- | --- | --- | --- | --- | --- | --- | --- | --- | --- | --- | --- | --- | --- | --- | --- | --- | --- | --- | --- | --- | --- | --- | --- | --- | --- | --- | --- | --- | --- | --- | --- | --- | --- | --- | --- | --- | --- | --- | --- | --- | --- | --- | --- | --- | --- | --- | --- | --- | --- | --- | --- | --- | --- | --- | --- | --- | --- | --- | --- | --- | --- | --- | --- | --- | --- | --- | --- | --- | --- | --- | --- | --- | --- | --- | --- | --- | --- | --- | --- | --- | --- | --- | --- | --- | --- | --- | --- | --- | --- | --- | --- | --- | --- | --- | --- | --- | --- | --- | --- | --- | --- | --- | --- | --- | --- | --- | --- | --- | --- | --- | --- | --- | --- | --- | --- | --- | --- | --- | --- | --- | --- | --- | --- | --- | --- | --- | --- | --- | --- | --- | --- | --- | --- | --- | --- | --- | --- | --- | --- | --- | --- | --- | --- | --- | --- | --- | --- | --- | --- | --- | --- | --- | --- | --- | --- | --- | --- | --- | --- | --- | --- | --- | --- | --- | --- | --- | --- | --- | --- | --- | --- | --- | --- | --- | --- | --- | --- | --- | --- | --- | --- | --- | --- | --- | --- | --- | --- | --- | --- | --- | --- | --- | --- | --- | --- | --- | --- | --- | --- | --- | --- | --- | --- | --- | --- | --- | --- | --- | --- | --- | --- | --- | --- | --- | --- | --- | --- | --- | --- | --- | --- | --- | --- | --- | --- | --- | --- | --- | --- | --- | --- | --- | --- | --- | --- | --- | --- | --- | --- | --- | --- | --- | --- | --- | --- | --- | --- | --- | --- | --- | --- | --- | --- | --- | --- | --- | --- | --- | --- | --- | --- | --- | --- | --- | --- | --- | --- | --- | --- | --- | --- | --- | --- | --- | --- | --- | --- | --- | --- | --- | --- | --- | --- | --- | --- | --- | --- | --- | --- | --- | --- | --- | --- | --- | --- | --- | --- | --- | --- | --- | --- | --- | --- | --- | --- | --- | --- | --- | --- | --- | --- | --- | --- | --- | --- | --- | --- | --- | --- | --- | --- | --- | --- | --- | --- | --- | --- | --- | --- | --- | --- | --- | --- | --- | --- | --- | --- | --- | --- | --- | --- | --- | --- | --- | --- | --- | --- | --- | --- | --- | --- | --- | --- | --- | --- | --- | --- | --- | --- | --- |
|  | |  |  | |
| **TEAM SCORE (The same for all 4 scenarios)** | |  |  | |
| **Scoring (Parts 1-11):** *always/nearly always*= **4**, *often* = **3**, *about as often as not* = **2**, *seldom =* **1**, *never/hardly ever =* **0** | |  |  | |
| **Scoring (Part 12):** **0-10** Points | |  |  | |
| **1. Leadership** | |  |  | |
| The team leader let the team know what was expected of them through **direction and command** | | Score: |  | |
| The team leader maintained a **global perspective** Prompts: Monitoring clinical procedures and the environment? Remaining “hands off” as applicable? Appropriate delegation? | | Score: |  | |
|  | |  |  | |
| **2. Team Work** | |  |  | |
| The team **communicated effectively**  Prompts: Verbal, non-verbal and written forms of communication? | | Score: |  | |
| The team **worked together** to complete tasks in a timely manner | | Score: |  | |
| The team acted with **composure and control** Prompts: Applicable emotions? Conflict management issues? | | Score: |  | |
| The team morale was **positive** Prompts: Appropriate support, confidence, spirit, optimism, determination? | | Score: |  | |
| The team **adapted** to changing situations Prompts: Adaptation within the roles of their profession? Situation changes: Patient deterioration? Team change? | | Score: |  | |
| The team **monitored and reassessed** the situation | | Score: |  | |
| The team **anticipated** potential actions Prompts: Preparation of defibrillator, drugs, airway equipment? | | Score: |  | |
|  | |  |  | |
| **3. Task Management** | |  |  | |
| The team **prioritised** tasks | | Score: |  | |
| The team **followed approved standards and guidelines** Prompts: Minor deviations may be appropriate depending on the scenario | | Score: |  | |
|  | |  |  | |
| **4. Overall** | |  |  | |
| On a **scale of 1-10** give your **global rating** of the team’s performance | | Score: |  | |
|  | |  |  | |
| **CALM SCORE**  **(The same for all 4 scenarios)** | |  |  | |
| **Scoring:** *always*= **3**, *mostly* = **2**, *sometimes* = **1**, *rarely =* **0** | |  |  | |
|  | |  |  | |
| **1. Leadership** | |  |  | |
| **Clear role** as leader throughout case | | Score: |  | |
| Style **appropriate and effective** for situation | | Score: |  | |
|  | |  |  | |
| **2. Communication** | |  |  | |
| Voice is appropriately **loud and clear** | | Score: |  | |
| **Addresses people** explicitly (e.g. by name) | | Score: |  | |
| Reinforces **closed-loop-communication** | | Score: |  | |
|  | |  |  | |
| **3. Task Management** | |  |  | |
| **Assigns** or acknowledges roles | | Score: |  | |
| **Directs** team effectively/assigns tasks | | Score: |  | |
| **Balances** the team’s **work load** | | Score: |  | |
| **Engages** team members in **decision making** | | Score: |  | |
| **Summarizes** case status **periodically** | | Score: |  | |
|  | |  |  | |
| **4. Medical Management** | |  |  | |
| **Prioritizes** task order | | Score: |  | |
| Maintains **global view** (avoids fixation bias) | | Score: |  | |
| Periodically **reassesses** the patient | | Score: |  | |
| **States next step(s)** in patient care | | Score: |  | |
| Aware of limitations and **seeks help** as needed | | Score: |  | |
|  |  | | |  | |

**Supplementary Table 1**

Complete scoring matrix used across all four simulation scenarios. The STAT tool was adapted to the scenario-specific medical actions required in each case. TEAM and CALM were applied in their original form across all scenarios to assess non-technical skills. Video recordings of all scenarios were independently rated by three blinded outcome assessors (board-certified anaesthesiologists with experience in both prehospital emergency medicine and simulation training) using this matrix.
