# Supplementary material
Source: Research Square preprint supplement (doi:10.21203/rs.3.rs-9268709/v1)
Supplement: Supplementary file 2 [file 1451ba4aef5c1c4880507d2e.docx]

**Supplementary Table 2.** Full results of the generalized linear mixed model (GLMM) for overall performance, including subgroup analyses by sex.

|  |  |  | |
| --- | --- | --- | --- |
|  |  | **Sex** | |
| **Composite overall performance** (%) | **All**  **(N=17)** | **Female**  **(N=8)** | **Male**  **(N=9)** |
| **Time point:** |  |  |  |
| C1 | 82 [76;83] | 82 [74;84] | 78 [76;83] |
| C2 | 74 [70;83] | 74 [69;78] | 82 [71;87] |
| C3 | 82 [68;83] | 81 [72;84] | 82 [68;83] |
| C4 | 83 [77;86] | 82 [78;90] | 83 [77;84] |
| ***Overall P* value (time point)*‡*** | 0.082 | 0.114 | 0.467 |
| **Contrasts***†***:** |  |  |  |
| C2 - C1 | -1 (95% CI: -5 to 3, p=0.528) | -3 (95% CI: -9 to 3, p=0.268) | 0 (95% CI: -6 to 6, p=0.956) |
| C3 - C1 | -1 (95% CI: -6 to 3, p=0.478) | -1 (95% CI: -6 to 5, p=0.733) | -2 (95% CI: -8 to 4, p=0.536) |
| C4 - C1 | 3 (95% CI: -1 to 7, p=0.104) | 4 (95% CI: -2 to 9, p=0.170) | 3 (95% CI: -3 to 9, p=0.322) |
| C2 - C3 | 0 (95% CI: -4 to 4, p=0.938) | -2 (95% CI: -8 to 3, p=0.437) | 2 (95% CI: -4 to 8, p=0.500) |
| C2 - C4 | -5 (95% CI: -9 to -1, p=0.027) | -7 (95% CI: -12 to -1, p=0.021) | -3 (95% CI: -9 to 3, p=0.348) |
| C3 - C4 | -5 (95% CI: -9 to -1, p=0.022) | -4 (95% CI: -10 to 1, p=0.094) | -5 (95% CI: -11 to 1, p=0.115) |
| *Sex subgroup comparison†* | | *Female vs. Male* | |
| ***Interaction P* value** |  | 0.738 | |
| **Overall** |  | 0 (95% CI: -8 to 7, p=0.915) | |
| **Time point:** |  |  |  |
| C1 |  | -1 (95% CI: -10 to 8, p=0.857) | |
| C2 |  | 2 (95% CI: -7 to 12, p=0.611) | |
| C3 |  | -2 (95% CI: -11 to 7, p=0.692) | |
| C4 |  | -1 (95% CI: -9 to 7, p=0.747) | |

*†* Estimates are based on a generalized linear mixed model (GLMM) with beta-distributed outcome, assessment time point and sex as categorical fixed effects, including their interaction, and participant-specific random intercept.

***‡*** P value for the overall effect of assessment time point, based on a likelihood ratio test comparing the full GLMM with a reduced model excluding assessment time point.

The GLMM included assessment time point (C1–C4), sex, and their interaction as fixed effects, with a random intercept for participant to account for repeated measurements. A beta-distributed outcome was used because the outcome was bounded between 0 and 100%. A likelihood ratio test was used to assess whether overall performance differed across the four assessment time points.
