# Supplementary material
Source: Research Square preprint supplement (doi:10.21203/rs.3.rs-9268709/v1)
Supplement: Supplementary file 3 [file 5ab14466881e01d0a624cbf6.docx]

**Supplementary Table 3.** Multivariable generalized linear mixed model (GLMM) of performance during acute high-altitude exposure (C2), adjusted for baseline performance, peripheral oxygen saturation (SpO2), Lake Louise Score, age, and prehospital experience.

| **Covariate** | **Beta** | **95% CI†** | **P value** |
| --- | --- | --- | --- |
| **Performance at C1** (%) | 5.5 | 2.8, 8.2 | <0.001 |
| **Age** (years) | 0.00 | -0.04, 0.03 | 0.8 |
| **Prehospital experience** (years) | 0.03 | 0.01, 0.06 | 0.008 |
| **Lake Louise Score at C2**(-) | 0.04 | -0.13, 0.21 | 0.6 |
| **SpO2 at C2** (%) | 0.06 | -0.07, 0.18 | 0.4 |
| **†**CI = confidence interval. Beta coefficients represent the adjusted association between each covariate and performance during acute high-altitude exposure (C2). Continuous predictors were entered per 1-unit increase as shown in the table. Participant was included as a random intercept. | | | |

Full regression results for a generalized linear mixed model (GLMM) with a beta-distributed primary outcome, measured at baseline (C1, 540 m) and during acute high-altitude exposure (C2, 3,450 m), including the following covariates: baseline performance, peripheral oxygen saturation (SpO2), Lake Louise Score, age, and years of prehospital experience.
